## On the permeability of cell membranes subjected to lipid oxidation

Daniel Wiczew<sup>1,2\*</sup>, Natalia Szulc<sup>1,2</sup>, Mounir Tarek<sup>2\*</sup>

<sup>1</sup>Wroclaw University of Science and Technology, Department of Biomedical Engineering, Poland,

<sup>2</sup>Université de Lorraine, CNRS, LPCT, F-54000 Nancy, France,

Provide full correspondence details here including e-mail for the:

\*Corresponding authors;

E-mail addresses: [daniel.wiczew@univ-lorraine.fr](mailto:daniel.wiczew@univ-lorraine.fr) (D. Wiczew), [mounir.tarek@univ-lorraine.fr](mailto:mounir.tarek@univ-lorraine.fr) (M. Tarek)

Keywords: electroporation, secondary oxidation products, molecular dynamics simulations, free energy calculations

### Abstract

The formation of transient hydrophilic pores in their membranes is a well-recognized mechanism of permeabilization of cells exposed to high-intensity electric pulses. However, the formation of such pores alone is not able to explain all aspects of the so-called electroporation phenomenon. In particular, the reasons for the sustained permeability of cell membranes, which persist long after the pulses' application, remain elusive: The complete resealing of the cell membranes takes indeed orders of magnitude longer than the time of electropore closure as reported from molecular modelling investigations. A possible alternative mechanism to explain the observed long-lived permeability of cell membranes, lipid peroxidation, has been previously suggested but the theoretical investigations of membrane lesions, containing excess amounts of hydroperoxides, have shown that the conductivities of such lesions were not high enough to reasonably explain the entire range of experimental measurements. Here, we expand on these studies and investigate the permeability of cell membrane lesions that underwent secondary oxidation. Molecular dynamics simulations and free energy calculations on lipid bilayer in different states show that such lesions provide a better model for post-pulsed permeable and conductive electropermeabilized cells. Furthermore, the results of the article are further discussed in the context of a type of cell death – ferroptosis, which is associated with lipid oxidation.

**Highlights:**

1. The contribution of secondary lipids' oxidation to the permeabilization of model membranes is quantitatively assessed
2. Small patches of secondary lipids' oxidation cause the formation of long-lived pores in lipid bilayers.
3. The cholesterol content of membranes enhances the lifetime of the formed pores.
4. A single pore accounts for the measured post-pulse electropermeabilization of cells.
5. The diffusion of the secondary oxidation lipids leads, even after pores closure to the permeability of the lipid membrane.
6. Lipid oxidation is discussed in terms of ferroptosis.

## Introduction

Electroporation (EP) is a well-known bio-method used to enhance the permeability of biological cell membranes [1–4]. This technique, which consists of exposing cells to pulsed electric fields (PEFs), enables the transport of various molecules such as drugs and genes, across their lipid membrane [5–8]. A current goal in improving our understanding of electroporation is the development of a comprehensive microscopic description of the phenomenon. Information about the sequence of events describing electroporation is gathered from measurements of electrical currents through planar lipid bilayers along with the characterization of molecular transport of molecules into (or out of) cells subjected to electric field pulses and from atomistic level details provided by Molecular Dynamics (MD) simulations of model membranes. It is now well accepted that long and intense electrical pulses induce rearrangements of the membrane components (water and lipids), which ultimately lead to the formation of aqueous hydrophilic pores whose presence increases substantially the ionic and molecular transport through the otherwise impermeable lipid bilayers. One of the main unsolved questions related to the electroporation phenomena is that the induced permeability of cell membranes can persist up to minutes after the applied electric fields are terminated as reported by several studies [9–12]. This is in large discrepancy with the pores sustainability that MD simulations indicate, which are rather in the order from tens of ns to the  $\mu$ s time scale [13,14].

It has been suggested over two decades ago, that membranes can be oxidized when subject to conditions similar to that of electroporation-based technologies. There is experimental evidence indeed that pulsed electric fields can increase the extent at which unsaturated lipid acyl chain peroxidation occurs. In particular, it has been shown that the application of external electric fields alters the phospholipid composition and properties of liposomes, vesicles, and cells [15–21]. The presence of oxidized lipids within bio-membranes is known to modify their physical properties and, in particular, their permeability [22–25]. One cannot therefore exclude that molecular uptake following PEFs treatments may, at least partially, take place through diffusion across oxidized/permeabilized lipid bilayer patches and not solely across the so-called electropores. In cells, the repair of such patches is a long-time process that might explain the sustainability of membranes' leakage.

Several studies demonstrated that applying PEFs to cells induces generation of reactive oxygen species (ROS) and oxidative damage of unsaturated lipids, as confirmed for instance by increased concentration of conjugated dienes [4] and hydrogen peroxide [19,20]. ROS concentrations and the extent of lipid peroxidation increase with electric field intensity, pulse duration, and the number of pulses (see [4] for review). PEFs don't generate radical oxygen species by direct action on the media exposed but appear to enhance their generation [26–28], most probably following a destabilization of mitochondria membrane or Fenton reaction [29,30].

Among the most potent ROSs, the hydroxyl radical ( $\text{HO}\bullet$ ), the superoxide radical anion ( $\text{O}_2^{\bullet-}$ ), and the hydroperoxyl radical ( $\text{HOO}\bullet$ ) are short-lived and highly reactive and, therefore, are believed to play a prominent role in cell membranes' lipid peroxidation [31]. These radicals can initiate chain reactions leading to chemical oxidation of the lipids and thus change in the physical properties of cell membranes [32,33].

HO• and HOO• radicals if reaching the interior of membranes containing unsaturated lipids (**L**) can initiate primary oxidized products by an allylic hydrogen abstraction (see Fig. 1) leading to the formation of lipid radical **L•** [33,34]. **L•** reacts with molecular oxygen, which is highly abundant in the membrane's interior [31] to form lipid peroxide radicals **LOO•**. The latter may further abstract hydrogen from another lipid to form a primary peroxidation product, **LOOH**, (hydroperoxide), and a lipid radical **L•**, initiating thereof a chain reaction.

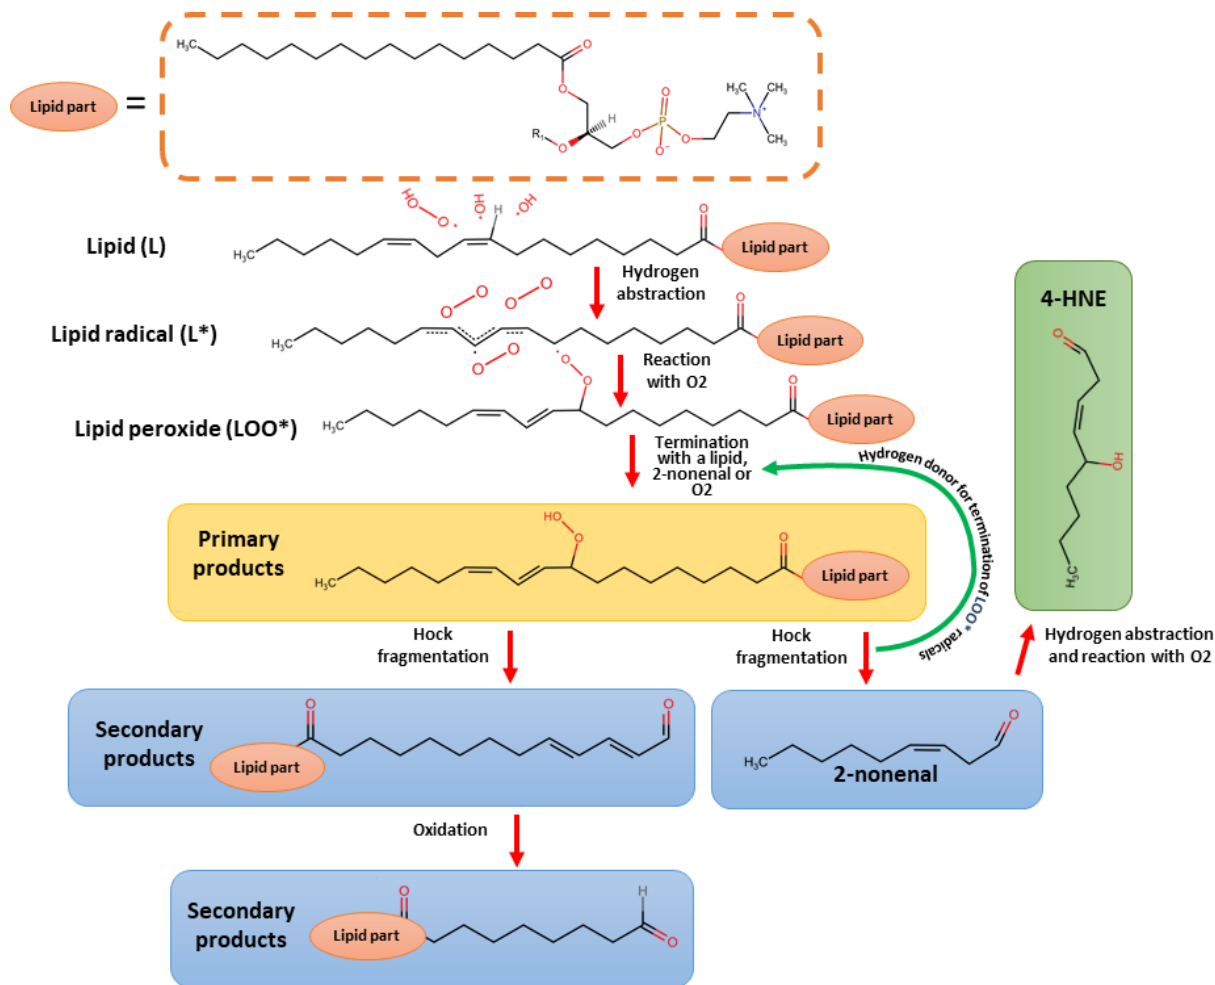

Fig. 1. Schematic pathway of process formation primary and secondary oxidation products.

In a recent work [35] we have investigated the permeability of membranes containing patches of various concentrations of hydroperoxidized lipids mimicking therefore the presence of patches of lipids that underwent peroxidized chain reactions. In particular, we estimated their conductance and permeability to monovalent ions using MD simulations and free energy calculations. The results of the calculations were compared to experimental measurements on electroporabilized cells. Our data showed that the permeability and conductance increase dramatically by several orders of magnitude in hydroperoxidized bilayers [36]. However, this increase was not sufficient to reasonably account for the entire range of experimental measurements. Furthermore, our data, consistent with experiments on giant unilamellar vesicles (GUVs) containing up to 60% lipid hydroperoxides or exclusively lipid hydroperoxide species [37], showed that the bilayers preserve their membrane integrity.

In this paper, we extend our investigation to study the permeability of membranes that underwent secondary oxidation. Indeed, oxidative lipid damage can result in various products

with truncated lipid tails ending with either an aldehyde or carboxylic group [38,39]. Hydroperoxides are converted into secondary products like 2-nonenal and PoxnoPC by Hock fragmentation [40]. The 2-nonenal is further converted to 4-HNE (4-hydroxynonenal) by reacting with a radical and oxygen in a similar fashion as unsaturated bonds in unsaturated lipids, thus potentially contributing to the kinetic's oxidation process (positive feedback loop). Previous MD simulations showed that oxidized lipids with an aldehyde group disturb the bilayer more than the ones with a peroxide one [41]. Bilayers with aldehyde-truncated tails on the other hand undergo spontaneous pore formation within a few hundred ns and lead in some cases to the bilayer complete disintegration (micellation) [41],[42],[37]. In contrast, Runas and Malmstadt [33] reported formation of pore defects in GUVs containing only 12.5% aldehyde-truncated 1-palmitoyl-2-(9 $\phi$ -oxo-nonanoyl)-sn-glycero-3-phosphocholine (PoxnoPC). Spontaneous pore formation in GUVs was reported also by Sankhagowit et al. [43] under conditions where aldehyde-truncated lipids were produced.

Our aim here is to thoroughly investigate the properties of lipid membranes that underwent such drastic chemical changes, with regard to their permeability. We will specifically consider a model (POPC) lipid bilayer reflecting properties of a real system [44] with a central patch of secondary product lipid oxidation (see Fig. 2).

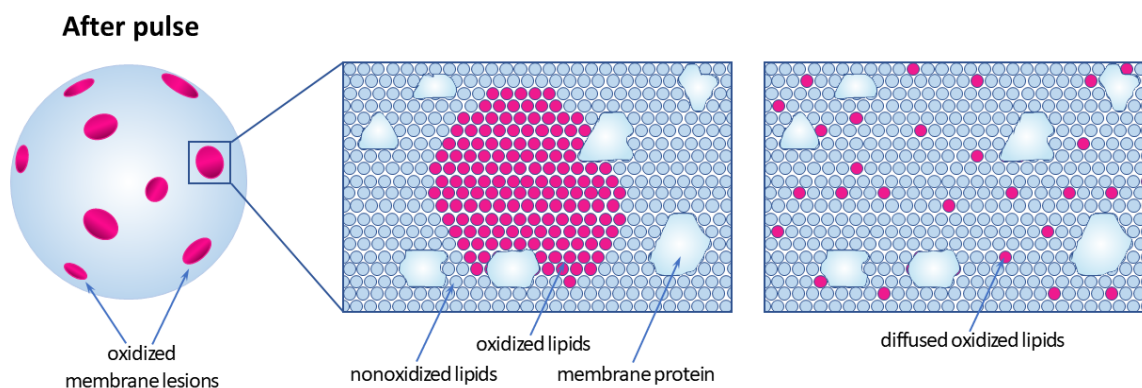

Fig. 2: Schematic representation of oxidized membrane lesions (secondary oxidized lipids), which are expected to be formed in the cell membrane after exposure to electric pulses. The schematic is hypothetical and the lesions are not drawn to scale. The image in the center schematically depicts the molecular organization in one of the lesions. The one on the right represents the state after a certain time, where the secondary oxidized lipids diffused out (adapted from [44])

The presence of such patches in cell membranes results from the radical chain peroxidation reaction that takes place between neighboring lipids. Fast kinetic reaction ratios obtained from state-of-the-art quantum chemistry calculations suggest that degradation of primary to the secondary oxidation products might be faster than lateral diffusion of lipids [40]. To mimic crowded conditions in the cellular environment, and the scenario where the patches are created in a gel-like raft domain of the cell wall, we considered as well, a second model membrane of POPC with 40% cholesterol content. Both models (with and without cholesterol) contain a central patch of PoxnoPC, a stable byproduct of PLPC [45] or POPC oxidation [46]. These simulations allowed to directly follow for microseconds the features of such patches. Furthermore, similarly to our previous investigation [35], we used free energy calculations

applying the Unified Free Energy Dynamics (UFED) method [47] to quantify the conductance and permeability to simple monovalent ions of bilayers in which oxidized lipids have diffused out of the initial patch to form homogeneous domains (see Fig. 2 right).

## 2. Materials and methods

### 2.1 Patch system calculations

#### 2.1.1 Systems

The initial system (SYST I) was built using PACKMOL [48] and consisted of a large 1-palmitoyl-2-oleoyl-sn-glycero-3-phosphocholine (POPC) bilayer, in which the central patch was replaced by a 1-Hexadecanoyl-2-(9-oxo-nonanoyl)-sn-glycero-3-phosphocholine (PoxnoPC) bilayer of 64 molecules per leaflet (see S2). PoxnoPC is a zwitterionic oxidized phospholipid bearing an aldehyde function at the end of its truncated sn-2 acyl chain. The whole bilayer model was further solvated in a solution containing sodium, calcium, and chloride ions (for more details see S2 in the SI). The second system (SYST II) was the analogous previous one, but the POPC lipid bilayer contained a 40 mol % of cholesterol (see S2 in the SI for more details)

Additionally, four simple lipid bilayer systems (POPC) containing PoxnoPC at molar concentrations of 0%, 10%, 20%, and 50% (respectively BIL1 to BIL4) were set and embedded in NaCl solutions (see Table S3.1 in the SI for more details). A System with the concentration of 80% of oxidized lipids was not stable (data are not shown here). BIL1 to BIL4 were studied to investigate how local concentrations of oxidized lipids influence the permeability and conductance of the lipid membrane. The systems were built in a similar way to SYSTI and SYSTII using PACKMOL, except that PoxnoPC lipids were distributed randomly across the POPC lipid bilayer. Over 1 $\mu$ s nanoseconds of simulations were run for every concentration.

#### 2.1.2 MD Simulations

To perform the simulations, POPC and cholesterol were parameterized with the CHARMM36 lipid force field [49]. We developed a CHARMM-consistent Force field parameter for modeling PoxnoPC following the protocol used by Jeffery B. Klauda et al. using state-of-the-art quantum chemistry calculations [49] (see S1 in the SI for the detailed protocol). We used the TIP3 model [50] for water and the electronic continuum correction (ECC correction) for the ions representation [51] as it allows an accurate description of sodium and calcium ions interaction with lipid bilayer's lipid headgroups (see [35]).

All simulations were performed using the GROMACS software considering 3-d periodic boundary conditions. All systems were first minimized using the steepest descent algorithm to remove interatomic clashes, then equilibrated at constant temperature T (310 K), and constant (semi-isotropic) pressure P (1 atm). Bonds between heavy atoms and hydrogens were constrained using the LINCS algorithm [52] allowing the use of a 2 fs MD timestep. The long-range electrostatic interactions were evaluated using the Particle Mesh Ewald method [53]. The Fourier grid spacing for the Particle Mesh Ewald method was optimized at the beginning of each simulation, to get the highest performance during the simulation. A switching function was used between 0.8 and 1.2 nm to smoothly bring the short-range electrostatic interactions and the van der Waals interactions to 0 at 1.2 nm.

### 2.1.3 MD analyses

To track the changes in the lipid bilayer's properties during the simulations, the thickness and area per lipid (APL) was assessed using PyBILT software [54]. The software is defining thickness and APL by defining grids on which lipid bilayer leaflets are projected, thus increasing the efficiency and precision of the calculations [55]. The thickness and APL were calculated for the whole simulation after restraints were removed.

To compare the influence of cholesterol on the lipid bilayer fluidity, the lateral diffusion  $D$  coefficient of the PoxnoPC lipids was estimated using the Stokes-Einstein's equation that links  $D$  to the mean square displacement of molecules. Ten lipids were selected based on the criteria of being not involved in the oxidized lipid clusters (see below). Then the diffusion coefficient was calculated using the GROMACS' MSD tool for diffused lipids for the last 40 ns of simulation time. The sizes of the pores were measured using the grid projected onto the membrane with Visual Molecular Dynamics (VMD) [56] "grid" tool in the ruler extension.

### 2.3 Free energy calculations using the Unified Free Energy Dynamics

Free energy methods allow ones to calculate free energy profiles with respect to a collective variable (CV). The CV maps a high dimensional atomic coordinate of an explored process (conformational change, ion permeation) into a low dimensional representation, that can be manipulated to obtain desired results. In the study, we used the recently developed method Unified Free Energy Dynamics [57],[47]. The latter combines ideas from two methods, d-AFED (driven Adiabatic Free Energy Molecular Dynamics) and metadynamics, resulting in superior convergence in comparison to both methods. The method was successfully used in our previous works [35],[58],[59] to obtain the potential of mean force (PMF) profile of ions and small radical species along the normal to a lipid bilayer. d-AFED works by connecting a CV  $q$  with harmonic potential (with coupling constant  $\kappa$ ) to an extended variable  $s$  (see equation (2)). The extended variable is adiabatically decoupled from the rest of the system, which is achieved by choosing large  $\kappa$  and mass of the extended variable. Such treatment allows the extended variable  $s$  to be set to different temperature  $T_s$  than the system, where the temperature is kept higher, which ensures better sampling of states in the phase space. The temperature  $T_s$  is usually set such that  $k_b T$  ( $k_b$  is Boltzmann constant) is similar to the energetic barrier of the studied process. Thus, the extended variable can easily cross the barrier and drags the CV alongside. In UFED, the regions of the phase space are explored using a bias that ensures a better sampling of the infrequently explored phase space regions. The bias, similar to the one used in metadynamics is in the form of Gaussian hills with given height  $h$  and variance  $\sigma$ , that is deposited gradually along the extended variable trajectory. The PMF  $\Phi(s)$  profile can be recovered by numerically integrating from the force  $F(s)$  acting on the extended variable  $s$ .

$$F(s) = -\frac{\delta\Phi(s)}{\delta s} = \kappa(q - s)_s \quad (1)$$

$$\Phi(s) = -\int_{s_{min}}^{s_{max}} F(s) ds \quad (2)$$

where  $s$  and  $q$  are extended variable and collective variable respectively and  $\kappa$  denotes the coupling constant for the mentioned harmonic potential. In our study, the extended variable was defined as the center of the lipid bilayer, whereas the collective variable was defined as the position of an ion (sodium or chloride) with respect to the bilayer center.

### 2.3.1 System preparation for UFED

BIL1 to BIL4 were equilibrated in the semi-isotropic NPT ensemble ( $T= 310$  K;  $P= 1$  atm) for over a  $\mu$ s. To verify convergence of the equilibration, the bilayer thickness, area per lipid and the number of hydrogens bonds between PoxnoPC's aldehyde group and water hydrogen were calculated [60]. The bilayer thickness and area per lipid were calculated the same way as in 2.1.3. The electrostatic potential profile along the membrane normal ( $z$ -axis) was evaluated considering the last 100 ns of the simulation using the Poisson's equation,

$$\phi(z) = -\epsilon_0^{-1} \iint \rho(z'') dz'' dz' \quad (3)$$

Where  $\rho(z)$  is the molecular charge distribution along  $z$ . The integration was performed by slicing the system into 1000 bins and averaging charge density within each bin and then integrating it according to the above equation using the GROMACS *g-potential* tool.

### 2.3.2 UFED parameters

One of our work's interests was obtaining the PMF profile of an ion (sodium and chloride) along the direction normal to the lipid bilayer containing secondary oxidation product lipids. Therefore, the CV was defined as a  $z$ -position of an ion. In agreement with our previous investigation, this collective variable was coupled with a harmonic constant of  $10^4$  kJ/mol/nm to a meta-variable of mass  $m_s = 2 * 10^4$  a.m.u. The extended system was coupled to a bath at a temperature  $T_s = 400$  K using a generalized Gaussian moment thermostat (GGMT). Gaussian-shaped potential hills, with a height of 1.0 kJ/mol and width of 0.01 nm, were deposited every 5000 MD steps (100 fs) To prevent movement of the lipid bilayer in the  $z$ -direction, the center of mass of the system (estimated from the average  $z$  position of the Lipids head group phosphorus atoms) was restrained in the  $z$ -position using a harmonic potential with a spring constant of 3500 kJ/mol/nm<sup>2</sup>.

### 2.3.3 UFED simulation protocol

The free energy calculations were performed using GROMACS 4.6.3 [61] patched with PLUMED 1.3 [62] that includes the implementation of d-AFED/UFED free-energy calculations [57],[47]. The parameters for the molecular dynamics were similar to the system preparation phase (2.3.1 above), except for the LINCS algorithm [52] parameters, which were adjusted toward more accurate calculations ("lincs-order" set to 6 and "lincs-iter" set to 2). The temperature of the simulation was set  $T = 300$  K both for steering and UFED calculations (see paragraph below), and thermostat coupling constants were set to 1.6 ps. More details about these parameters can be found in the supplementary material S3.4.

A multiple walkers' strategy, which involves the parallel evolution of multiple (16) metadynamics simulations sharing the same bias potential history file, was employed in order to increase computational efficiency. The UFED calculations were hence performed using 16 separate sub-simulations (called further walkers) in parallel. Each walker started at a different initial configuration, in which the position of the ion (Na or Cl) along the bilayer normal was obtained by steering the latter toward the center of the lipid bilayer in an independent MD run. The initial configuration of this run was the last frame from the well equilibrated (1  $\mu$ s)



trajectory described in section 2.3.1. The steering was performed using a spring constant of  $3500 \text{ kJ/mol/nm}^2$  and a velocity of  $0.3 \text{ nm/ns}$  using PLUMED. Then the steered configurations were saved by every 0.1 nm, from 6.5 nm to 3.45 nm to the center of the lipid bilayer, giving 16 configurations in total. Further molecular dynamics parameters for steering were the same as for UFED, the same goes for temperature that was  $T = 300\text{K}$ .

The UFED calculations were performed for 80 ns for each walker of the systems listed in the 2.3.1 (8 calculations in total - 4 for chloride, 4 for sodium). The output for the UFED variables ( $q$ ,  $s$ , etc.) were saved every 0.04 ps of the simulations. An example of two trajectories for two walkers is shown in the SI S3.5. To ensure convergence and estimate uncertainty, a second UFED run was performed in the same way as the first one. Except that, the initial configuration was different than in the first one run.

### 2.3.4 Analysis of PMF profiles

The PMF profiles were evaluated based on the equation (3) using a custom Matlab scripts (Matlab R2019a, MathWorks) which were adapted from the scripts developed by M. A. Cuendet [35],[47],[58]. This was achieved by a multistep calculation workflow that started by dividing obtained force along a collective variable  $\mathbf{s}$  into 120 bins in the interval  $z = [-3.0, 0.0]$  nm. Then the forces  $F = \kappa(q - s)_s$  were sampled over the UFED run and averaged within each bin. These forces then were slightly smoothed with a kernel smoothing regression (Matlab function `ksr`) with a bandwidth of  $1/30$  nm. Finally, the forces were integrated with cumulative trapezoidal numerical integration (Matlab function `cumtrapz`) to obtain the PMF over the interval  $z = [-3.0, 0.0]$  nm. This profile was then mirrored across the center of the bilayer.

To estimate the uncertainty of the profiles, we performed an additional UFED run for each of the investigated systems. The second UFED run was performed in the same way as the first run, except that the initial configurations of the walkers were different. The PMF profiles were determined the same way as the previous run. A mean over the two runs is shown as a PMF in the manuscript (see Fig. 6). The two runs are used to confirm the convergence and reliability of the UFED method see S3.6 in the SI.

## 2.4 Estimations of the permeability and the conductance

The bilayer permeability to a given ion was calculated according to the inhomogeneous solubility-diffusion model [63–65].

$$P = \left( \int_{z_1}^{z_2} \frac{\exp(\Phi_{ion}(z)/RT)}{D_{ion}(z)} dz \right)^{-1} \quad (5)$$

Where  $\Phi_{ion}(z)$  is the PMF (Na or Cl) ion along the  $z$ -axis,  $R$  is the universal gas constant,  $T$  the temperature of the system and  $D_{ion}(z)$  the diffusion coefficient of the ion along the  $z$ -axis (see next section). The integration boundaries were taken as  $z \in [-3.0, 0.0] \text{ nm}$ . The uncertainty of the values was estimated given the uncertainty of the PMF and that on the  $D_{ion}(z)$ . The former was estimated based on the maximum and minimum value of obtained permeation from two separate UFED runs. The lower and upper two values were multiplied by 1.33 and 0.67, corresponding to the maximum variation between maximum/minimum values relative to smoothed  $D_{ion}(z)$  profile (more in the SI XYZ). The uncertainty is about  $\pm 33\%$

in the average scenario (highest error among all diffusion calculations). It was applied to all other diffusion calculations.

As in [35], the total and ionic conductance (in S/m<sup>2</sup>) of Na and Cl were calculated using [63],[66]:

$$G_m = G_{Na} + G_{Cl} = \frac{N_A |q_e|^2}{k_B T} c (P_{Na} + P_{Cl}) \quad (6)$$

where  $G_m$ ,  $G_{Na}$  and  $G_{Cl}$  are respectively the total sodium, and chloride conductances.  $N_A$  is Avogadro's number,  $q_e$  is ion's charge,  $k_B$  and  $T$  are Boltzmann's constant and temperature. The concentration and temperature for the sake of this work were assumed as 150 mM and  $T = 300$  K respectively – the same as used in the UFED and diffusion calculations. The uncertainties were calculated based on the uncertainty propagation rule for addition, diffusion's uncertainty, and two UFED calculations, obtaining lower and upper bound for conductivity in a similar manner as in the case of permeation.

## 2.5 Diffusion coefficients

The diffusion coefficients of the ions across the membranes were determined similarly as in [35],[63] by performing umbrella sampling on the ion constrained in the z-positions using a harmonic potential with a spring constant  $\kappa = 3500 \text{ kJ/mol/nm}^2$ . The initial configuration was obtained from the both steered trajectories performed during preparation to the UFED calculations (see 2.3.3 above), thus giving 32 configurations in total. The MD parameters were the same as in the UFED calculations (see section 2.3.1). For each walker  $i \in [0, 31]$ , a 10 ns long trajectory was generated, where the first two ns were considered as an equilibration phase. The remaining 8 ns were divided into four equal segments. For each one, the diffusion coefficient for a given configuration  $i$  was calculated as:

$$D_i = \frac{\langle \delta z^2 \rangle_i}{\tau_i} \quad (7)$$

The variable  $\tau_i$  here is the correlation time for the  $i$ -th configuration and was calculated using the method of Hummer [67]. Further,  $D_i$  obtained for each of the configurations was averaged over the four 2 ns long parts. Finally, the averaged values were smoothed with a kernel smoothing regression (Matlab function `ksr`) with a bandwidth of 0.2 nm. The smoothed profiles were used in the calculation of membrane permeability and conductivity.

## 3. Results

### 3.1 Patches of secondary products of lipids oxidation undergo spontaneous and long-lived pore formation

Fig. 3 reports snapshots from the MD trajectories for SYSTI and SYSTII (respectively Pure POPC and POPC:40% cholesterol). The systems represent small patches of PoxnoPC located in the center of the membrane that model “hot spots” resulting from a peroxidation chain reaction initiated by a ROS attack, followed by a secondary oxidation of the hydroperoxide lipids (see Fig. 1).

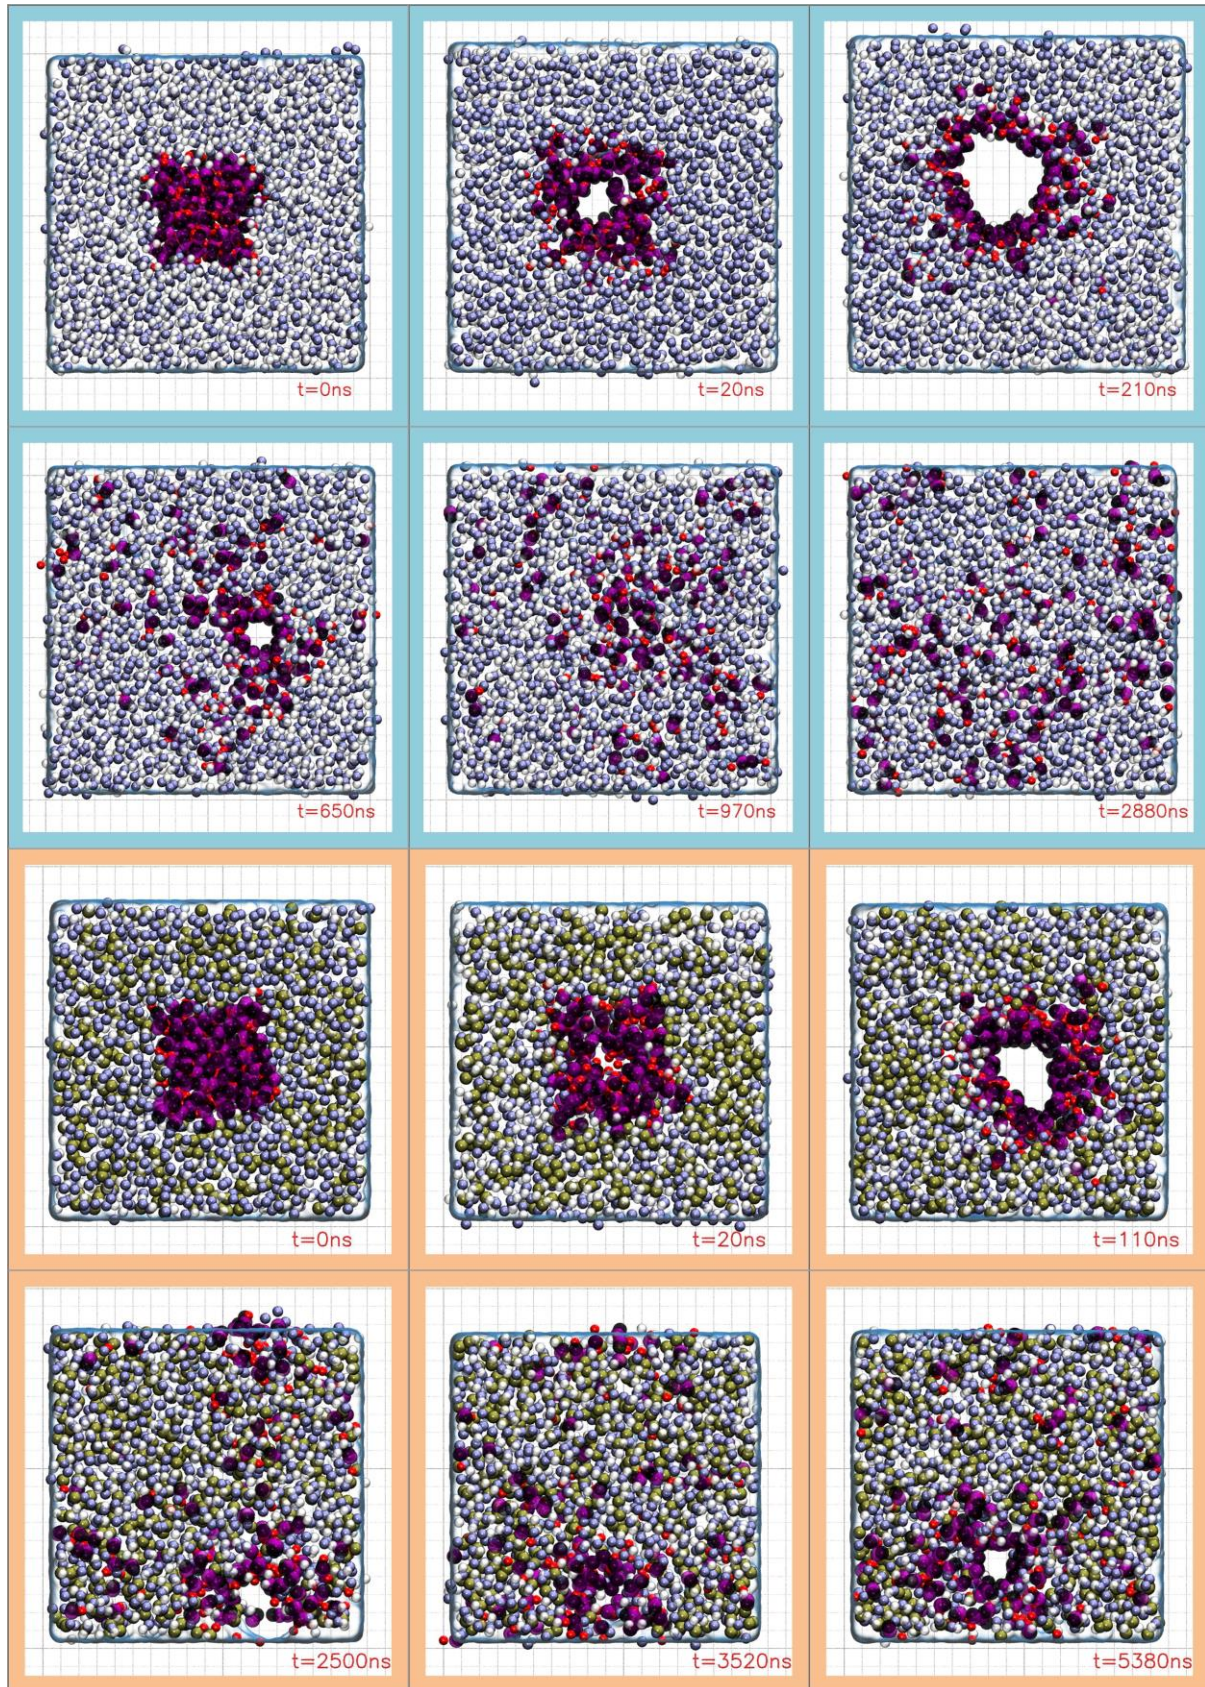

**Fig. 3.** Time evolution of pore formation in the systems without cholesterol (blue panels) and with cholesterol (orange panels), top view. The grid size is 1nm. The blue and white spheres represent the choline and phosphate groups of the POPC molecules. The black and magenta

spheres represent the phosphates and choline of the the PoxnoPCs molecules, the red spheres correspond to aldehyde oxygen at the PoxnoPCs lipid tails, and the cholesterol's OH groups are drawn as yellow spheres. The corresponding membrane cross sections can be found in SI S2.3 along with the videos of the full MD trajectories.

The simulations indicate that the presence of such a PoxnoPC patch, given the localized high concentration of aldehydes, leads within a few nanoseconds to a lipid pore formation. As the simulations are carried out at 0 surface tension (anisotropic NPT ensemble at 1 Atm, see Casciola et al. 2016 [7]), these pores expand quickly to reach a maximum size of about 7 nm and 5 nm in diameter for SYSTI and SYSTII respectively. Such large pore in the diameter, enables transport of DNA [68] and fluorescent dyes, such as: propidium iodide, calcein [69]. For the former system, because of the liquid crystalline state of the POPC, the PoxnoPC molecules diffuse out of the patch, leading to a pore shrinking (see Fig. 3), basically as the number of neighboring PoxnoPC molecules decreases. Within a couple of  $\mu\text{s}$ , this pore shrinks to a diameter of  $\sim 0.6$  nm, then the pore closes. For SYSTII, the diffusion of the PoxnoPC out of the initial patch is much less rapid, due to the gel-like structure of the remaining lipid bilayer (40% cholesterol). Indeed, estimation of the lateral diffusion coefficients  $D$  of PoxnoPC in the system with 40% cholesterol  $(6.2 \pm 0.9) \times 10^{-12} \text{m}^2 \text{s}^{-1}$ , is smaller than that of the pure POPC bilayer, namely  $(12.0 \pm 2.8) \times 10^{-12} \text{m}^2 \text{s}^{-1}$ . Consequently, the number of oxidized lipids around the pore remains high enough to maintain an aperture of  $\sim 1.35$  nm diameter well beyond 5  $\mu\text{s}$ .

### ***3.2 Properties of lipid bilayer after diffusion of the secondary oxidation lipid products***

In order to study the permeability of the regions of cell membranes that contain oxidized lesion long after the initial state, we have modeled several systems for which the secondary products have diffused enough so that the pores close (Fig. 3 ). These systems represent the large region of cell membranes composed therefore of a homogeneous distribution of PoxnoPC within an intact bilayer. We set hence POPC bilayers with concentrations of PoxnoPC ranging from 50 mole % to 10 mole % and studied both their characteristics and permeability.

First, at these concentrations, MD runs exceeding 100 ns did not reveal any destabilization of the membranes at these oxidized lipids concentrations. No pores/water or ion leaks were formed during the simulations. The structural properties of the bilayers reported in Figure 4 show monotonic changes of the area per lipid and bilayer thickness compared to the values for the pure POPC bilayer (respectively 3.93 nm and  $0.65 \text{nm}^2$ ). The latter are within 0.5% to 1% of the experimental values reported for POPC at 30 degrees [70] which provides some confidence in the force field parameters used.

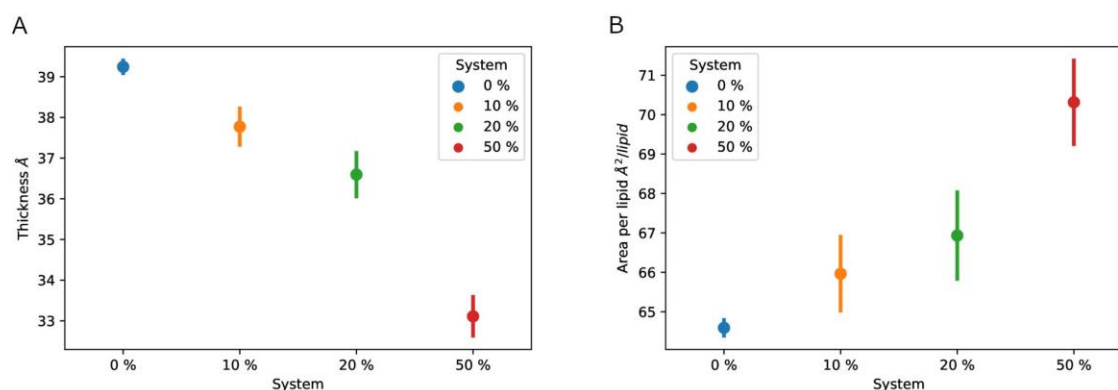

**Fig. 4** Thickness (A) and area per lipid (B) for lipid membranes with 0%, 10%, 20% and 50% percent of secondary oxidation lipids (PoxnoPC) in the POPC lipid bilayer. The bars indicate standard deviation based on the last 100 ns of the MD trajectories.

### 3.3 Ion penetration barrier for lipid bilayer after the diffusion of secondary oxidation lipid products

The PMF profiles of the translocation of the Na and Cl ions across the bilayer systems with 0% (pure POPC bilayer) 10%, 20%, and 50% homogeneous mol% distribution of PoxnoPC are reported in Fig. 5. All the profiles are  $\Lambda$ -shaped, similar to those reported in previous studies [35],[71]. As the percentage of the oxidized lipids increases, the free energy barrier progressively decreases for both the anion and the cation, as reported for lipids bilayers containing hydroperoxides [35]. The bilayer with 50% of PoxnoPC lipids has the lowest barrier in comparison to the other bilayer systems.

Note that calculations with concentrations higher than 50% of oxidized lipids were not considered due to formation of pores in the simulations of such systems (for instance at 80% PoxnoPC), as was the case for SYSI and SYSII. It is fair to assume accordingly that systems with oxidized lipid concentration higher than 50% would have negligible or virtually zero energetic barrier to permeation as ions can pass freely through the formed pores.

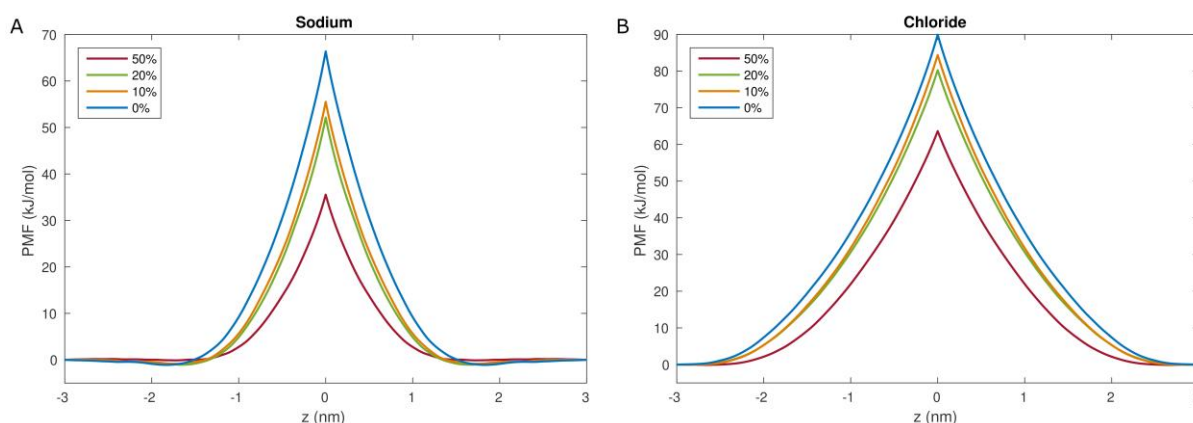

**Fig. 5.** The PMF profiles of Na ion (A) and Cl ion (B) in the investigated bilayer systems. The center of the bilayer is at  $z = 0$  nm. The ion penetration barrier is the difference between the lowest PMF on the plot and the highest one for a given PoxnoPC concentration.

### 3.4 Permeability and ion conductance of lipid bilayer with secondary oxidation products

The permeability to each ion species and the total conductance of the systems BILI to BIL4 are depicted in Fig. 6. As the percentage of oxidized lipids increases, the permeability and conductance do so as well. Noticeably, the  $\text{Na}^+$  permeability of the POPC lipid bilayer with 50% of PoxnoPC is 5 orders of magnitude higher than the permeability of the pure bilayer, increasing from  $10^{-11} \text{ m/s}$  to  $3 \cdot 10^{-6} \text{ m/s}$ . The same can be observed for the  $\text{Cl}^-$ , where the permeability increases from  $2 \cdot 10^{-15} \text{ m/s}$  to  $6 \cdot 10^{-11} \text{ m/s}$ , i.e. by over 4 orders of magnitude.

These changes are reflected in the magnitude of changes in the overall conductance. Hence, the analysis of the simulations data using eq (6) shows that the conductance of the lipid bilayer containing 50% of secondary oxidation PoxnoPC lipids product is 5 orders of magnitude higher than that of the non-oxidized lipid bilayer.

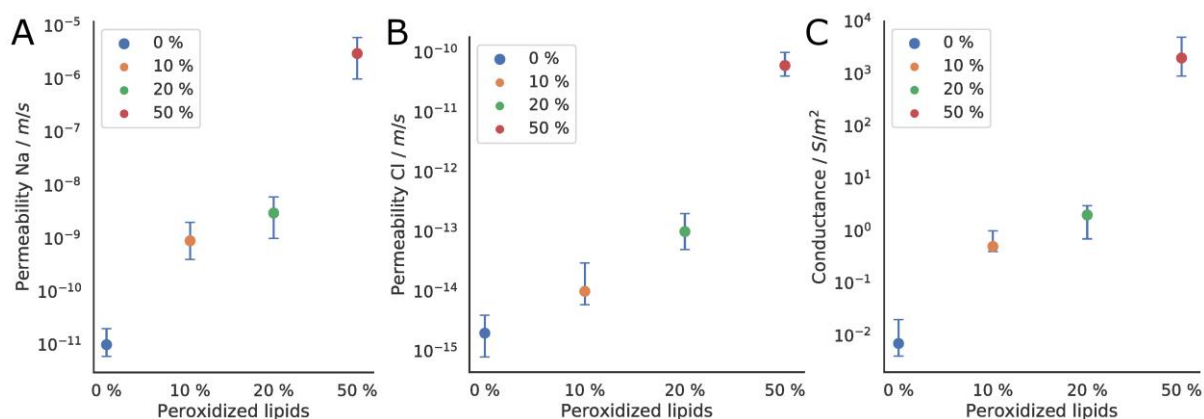

**Fig. 6.** Permeability to  $\text{Na}^+$  (A) and  $\text{Cl}^-$  (B) ions and overall conductance (C) of the studied systems.

## 4. Discussion

It has been suggested in recent literature that lipid oxidation could be a possible reason for sustained lipid membrane permeability, a phenomenon that manifests itself as persistence of cell membranes permeability that lasts up to minutes after the electric fields that triggers membrane electroporation are switched off. This phenomenon can be found not only in the electroporation [72] but also in sonoporation [73] as well as in photodynamic therapy [74]. Additionally, the lipid oxidation products play a key role in the chronic disorder of the nervous system like Alzheimer or Parkinson disease (more in the section 4.5).

To date, however, no rationale for this phenomena has been offered. The aim of this study was to investigate whether oxidative lesions of cell membranes, composed of secondary lipid oxidation products can give rise to such a behavior. Indeed, previous studies by our group have concluded that membranes that underwent primary oxidation alone, namely membranes with an excess amount of hydroperoxides, were not leaky enough to account for cell permeability and conductance measured in experiments where cells were exposed to PEF usually used in electroporation-based technologies and treatments.

Hence, we have herein conducted MD simulations of molecular systems aiming at modeling the behavior of cell membranes subjected to lipid oxidation. The first set of simulations was meant to model membranes immediately after exposure to the electric field and therefore to oxidation. We have assumed that peroxidation of lipids followed by secondary oxidation would

produce “spots” or “patches” of oxidized lipids at the surface of cells (Fig. 2). We have studied the outcome of such spots when they are formed in a fluid lipid phase, namely a POPC lipid bilayer above the transition temperature, or formed in a “gel-like” lipid phase, namely a POPC bilayer containing a high amount of cholesterol.

#### ***4.1 Secondary oxidation lipids and pore formation in the lipid bilayer***

The results in Section 3.1 shows that a small patch of secondary oxidation aldehyde lipids (PoxnoPC) is enough to form spontaneously a large pore (up to ~ 5 nm diameter) in both lipid bilayers - with and without cholesterol. This indicates that the oxidation of only a small area of a cell membrane would induce the formation of wide enough pores to transport ions and large molecules. Similar behavior was observed in other molecular dynamics studies, where a high concentration of various oxidation aldehyde lipids induced pore formation and micellization [75],[76]. In an experimental study of giant unilamellar vesicles (GUVs), Runas and Malmstadt reported that 12.5% or higher concentration of PoxnoPC in a GUV induces fluorescein-dextran uptake into the GUV and suspected that it could be due to pore formation [77]. Sankhagowit et al. [43] reported, that GUVs with light-induced lipid oxidation show line tensions changes and surface area per lipid changes, that could be interpreted as a pore opening.

#### ***4.2. Secondary oxidation lipid’s pores and their conductance***

While commonly described electric field-induced pores following rearrangement of the membrane components are easily attributed to allowing ionic transport by computational as experimental studies [4],[7],[78] they do not explain sustained (long time scale) post-pulse permeation.

Among the experimental methods which enable detection of lipid oxidation products one may cite spectrophotometric [79,80], chromatographic [81],and immunochemical [82] ones. The other methods based on fluorescent dyes are wildly applied to probe oxidation in live cells and organisms [83,84] However, these techniques are able to detect the widespread and uniform distribution of lipids [85]. The sensitivity of these methods remains a challenge, especially the detection of small changes in secondary oxidation products. Further, those lipids stay most probably in the membrane and only its low-molecular products, like malondialdehyde that is detected during electroporation [86–88] dissociate.

In the following we will question if pores that are formed by oxidative patches similar to those studied above, can be, in anyway, correlated to the sustained permeability and conductance measured in cells exposed to PEFs. We recall from [35] that  $N_{pore}$  the number of pores needed in a cell to provide an increase of normalized membrane conductivity  $\Delta g$ (in units nS/pF) can be expressed as:

$$N_{pore} = \frac{\Delta g C_{cell}}{G_{pore}} \quad (8)$$

where  $C_{cell}$  is the total capacitance of the cell membrane and  $G_{pore}$  the pore’s conductivity. The analytical expression for cylindrical pore can be expressed [89] as:

$$G_{pore} = \frac{2\pi\sigma_{pore}r_{pore}^2}{\pi r_{pore} + 2d_{pore}} \quad (9)$$

where  $\sigma_{pore} = (\sigma_{extra} - \sigma_{intra})/\ln(\sigma_{extra}/\sigma_{intra})$ , is a function of  $\sigma_{extra}$  and  $\sigma_{intra}$  the extra- and intracellular  $r_{pore}$  is a diameter of pore and  $d_{pore}$  its length.

Using equation (8) and (9), one can, therefore, estimate the number of pores required to reach a given change in cell's conductivity  $\Delta g$  or the change  $\Delta g$  per pore ( $\Delta g/N_{pore}$ )

Hence, considering the pore radius  $r_{pore} \sim 2.5$  nm (data from section 3.1), and the values of  $C_{cell} \sim 6$  pF [90] and  $\sigma_{extra} = 1.48$  S/m [91]  $\sigma_{intra} = 0.5$  S/m extracted from experiment, and  $d_{pore}$  the thickness of the lipid bilayer  $\sim 5$  nm,  $\Delta g/N_{pore}$  amounts to  $\sim 0.3$  nS/pF per pore.

Quite interestingly, the conductivity changes reported for GH3 cells from 5 to 10 s after the application of a 60 ns PEF of amplitudes ranging from 4.8 to 14.6 kV/cm is in the range of 0.1 - 1.5 nS/pF (values were obtained from Fig 3a. of [92] normalized with the GH3 cell's capacitance of 6pF [90]).

Hence, our data indicate clearly that one to few pores of the size of those formed by the small patch of oxidized lipids in the GH3 cells is enough to account for changes reported in their membrane's conductivity. The mere patch of 6.6 x 6.6 nm of 128 truncated oxidized PoxnoPC lipids (64 per leaflet) mimicking the presence of patches of lipids that underwent peroxidized chain reactions is able to form a pore big enough to explain most of the change in ion conductivity, and thus increased permeation.

### ***4.3 Pore lifetime in a real lipid bilayer system***

In the previous discussion (Section 4.1) we highlighted that pores formed by small patches of oxidized lipids could explain the high permeability of cells. However, the timescale during which pores forming in our simple model of fluid-like bilayers (POPC) remain open is too short (few microseconds) to account for experimental observation. To mimic crowded conditions in the cellular environment, and the scenario where these patches are created in a gel-like raft domain of the cell wall, we considered enriching lipid membranes composed of highly fluid lipids (like POPC) with cholesterol, decreasing thereby their fluidity [93]. We set up a similar lipid bilayer as previously, but with the addition of 40 mol % cholesterol. As stated in Section 3.1, the oxidized lipids of the patch quickly rearrange in the bilayer to form pores. However, under these conditions, the lifetime of the pore increased significantly, and the pore remains open during the whole simulation time ( $\sim 5$   $\mu$ s). This shows that membrane fluidity significantly affects pore's lifespan.

### ***4.4. Conductance after truncated oxidized lipid diffusion and pore closure***

The simulations of SYSI and SYSII show that oxidized lipids diffuse out of the pore rim toward the neighboring region where they form domains with high "homogeneous" concentrations of truncated lipids. These concentrations decrease with time (due to further lateral diffusion of PoxnoPC) while the domains enlarge. In order to study the permeability of such regions, we estimated the conductance (see Section 3.4) for model (POPC) membranes with 50%, 20%, 10% PoxnoPC with experimental values of conductance normalized to the GH3 cell's 6pF capacity. We first calculated the normalized conductance's of the 3 systems using the



capacitance  $C_m$  per unit area ( $\sim 1 \mu\text{F}/\text{cm}^2$  [94,95]) which resulted in 200 nS/pF, 0.2 nS/pF, 0.05 nS/pF. (for more information on how to calculate, check L. Rems supplementary information [35]).

Quite interestingly, the modeled conductance increase  $\Delta g_{ox}$  is comparable to the conductance increase  $\Delta g_{exp}$  reported for GH6 cells and recorded 2-3 min after subject them to a 60 ns single PEF [92], namely  $\sim 0.05$  nS/pF to  $\sim 0.5$  nS/pF with respect to control. We can estimate the fraction  $f_{ox}$  of the cell's membrane that is needed to obtain the measured conductances (more details and derivation in Lea Rems et al 2019, section 4.1) using:

$$f_{ox} = \frac{A_{ox}}{A_{cell}} = \frac{\Delta g_{exp}}{G_{ox}/C_m} = \frac{\Delta g_{exp}}{\Delta g_{ox}} \quad (9)$$

Accordingly, agreement with the data reported for GH6 cells would require that about 0.025% to 0.25% of the cell's lipids membrane area to be oxidized at 50%, whereas for the other limiting case with 10% degree of oxidation, it would require 100% to 1000% of the lipid membrane area to be oxidized.

Since pore re-forming was observed during the simulation with excess amounts (over 80%) of homogeneous PoxnoPC distribution, it could be hypothesized, that a mixture of pores and regions with a high concentration of oxidized lipids could also lead to significant cell's sustained permeation.

#### ***4.5. Lipid oxidation and pore formation beyond electroporation***

In the introduction, it was discussed that PEFs don't generate radical oxygen species (ROS) directly, but appear to enhance their generation [26–28]. Following this sentence, we can ask a question, whether, in other situations, where there is enhanced ROS generation, there will be pore formation due to lipid oxidation. We will discuss this in terms of one type of cell death – ferroptosis.

Programmed cell death is a process that leads a living cell into controllable death, which in contrast to necrosis, does not lead to leakage of organelles and doesn't induce proinflammatory response [96]. In recent years, many other forms of cell death were discovered aside from apoptosis, like necroptosis or ferroptosis. The name of the last one comes from the iron-dependent mechanism and its accumulation. Ferroptosis is characterized by intensive lipid oxidation, ROS generation, NADPH oxidation, GSH depletion [97,98]. The newest view on ferroptosis is that cell death is caused by pore formation of unknown origin [99,100]. Based on pore formation and extensive lipid oxidation, here we are trying to explain in the context of our work. Since lipid oxidation is detected in ferroptosis, it could be suspected, in the context of our work, that the pores are formed due to secondary lipid oxidation. In the work of Michelle Riegman et al., they reported that cells can be protected from ferroptosis by “blocking pores” using polyethylene glycol (PEG 1450 and 3350), but not sucrose or raffinose [99]. This is explained, that the first one is big enough to block pores (diameter of around 2.4 nm or more for PEG 1450 [101]) than the other two (diameter of around 1 nm for both), so pores should be bigger than 1 nm but smaller than around 2.4 nm. Although it supports the hypothesis of pores due to lipid oxidation. Also in a manuscript of Lohans Pedrera et al., it was reported that, nanoscale pores are formed prior to lipid oxidation and cause  $\text{Ca}^{2+}$  influx into the cell [102].

Nevertheless, pore formation may not always be enough to bring down a cell. That's why not all cells are susceptible to the same extent. Ferroptosis is reported as one of the fundamental forms of cell death in many neurological diseases [103], including Alzheimer's disease or Parkinson's disease [104], and Cerebral Ischemia [105]. The susceptibility of neural cells to ferroptosis, we explain the following way in the context of our research. As previously described, in the ferroptosis pores are formed due to lipid oxidation. Those pores may transport ions, which may cause calcium overload, and cell death if there are enough pores to exceed the cell's ion channel capabilities. Nevertheless, even if the membrane oxidation is not extensive enough to cause vast pore formation, still it can cause a lot of burdens. Pore formation in the lipid membrane can cause a drop in transmembrane potential due to the influx of calcium, sodium, chloride ions and outflux of potassium ions. Thus causing a depolarizing of the lipid bilayer and activation of Voltage-Gated Calcium Channels (VGCC), which may cause a further influx of calcium into the cell [106]. Indeed blocking VGCC by nifedipine (an L-type VGCC blocker), largely prevents neuronal death from intra-cerebroventricular FeCl<sub>3</sub> injection [107]. Although, in other studies, it was shown, that nifedipine works as a potent antioxidant and decreases lipid peroxidation in cells [108,109]. Thus it is not clear whether the neuronal death prevention is due to antioxidant properties (and thus prevention of oxidative pore formation) or VGCC blocking effect, or maybe both.

The link between VGCC activation by lipid oxidation pore formation may be further supported by the strong link of ferroptosis (which causes extensive lipid oxidation) and calcium signaling pathways [110–112], in neurological diseases. But also it can be another way, where an unknown process stimulates both processes in parallel, like ferroptosis (and thus lipid oxidation) and calcium channel activation.

Nevertheless, links between concepts of pore formation due and lipid oxidation and diseases, biological processes presented in these sections, require more research to uncover more details about those processes. But pore formation due to lipid oxidation can be applied to every topic, that happens at the boundary of the lipid membrane.

## 5. Conclusions

We investigated whether the secondary lipid oxidation products could contribute to the long-lived permeability and conductance to the electroporabilized cell lipid membranes, which persists after the application of the electric pulse. For this purpose, we performed a large number of simulations that indicated large pores formation due to oxidized lipids, and we calculated the permeability for the cases when pores are formed and when the lipid mobility and fluidity would lead at some point to pore closure. Overall, our modeling results and data analyses indicate that the pore formation due to the presence of secondary oxidation aldehyde lipids can quantitatively match the lowest to the highest reported experimental changes in the cells' conductivity and permeation. We investigated the influence of membranes' composition on the lifetime of the pores by studying mimics of lipid "gel-like domains" containing cholesterol concentrations and have shown that indeed the lipid dynamics in these cases slow down the pores' closure. Since real cell membranes are crowded, with ~ 50% of the cell's surface composed of proteins [113]. Furthermore, proteins show a strong negative influence on lipid membrane's fluidity [114,115], [116]. We can therefore safely conclude based on our investigations that the presence of secondary oxidation lipid patches resulting from direct oxidation could form pores with lifetimes far longer than herein assessed from simulations (or for instance from biophysical experiments on vesicles) where proteins are absent. Since starved

cells don't reseal completely [117], it is possible that some pores would remain formed as long as the cell lipid machinery does not take over to repair the damage.

## Funding sources

This work was partially supported by the National Centre for Research and Development, Poland under POWR.03.02.00-00-I003/16 (N.S.). M.T. acknowledges the support from the Contrat État Plan Region Lorraine 2015–2020 subproject MatDS.

## Acknowledgments

The authors acknowledge the Centre de Calcul Régional *ROMEO* (<https://romeo.univ-reims.fr/>) for providing substantial computational resources. The authors thank Paulina Rozborska and Kinga Woźniak for the preliminary preparation of the patch systems and Lea Rems for assistance in the analyses of the free energy calculations.

## Declaration of interest statement

No potential conflict of interest was reported by the authors.

## References

- [1] J. Gehl, Electroporation: theory and methods, perspectives for drug delivery, gene therapy and research, *Acta Physiol. Scand.* 177 (2003) 437–447. <https://doi.org/10.1046/j.1365-201X.2003.01093.x>.
- [2] T.S. Anirudhan, S.S. Nair, Development of voltage gated transdermal drug delivery platform to impose synergistic enhancement in skin permeation using electroporation and gold nanoparticle, *Mater. Sci. Eng. C.* 102 (2019) 437–446. <https://doi.org/10.1016/j.msec.2019.04.044>.
- [3] M.L. Yarmush, A. Golberg, G. Serša, T. Kotnik, D. Miklavčič, Electroporation-Based Technologies for Medicine: Principles, Applications, and Challenges, *Annu. Rev. Biomed. Eng.* 16 (2014) 295–320. <https://doi.org/10.1146/annurev-bioeng-071813-104622>.
- [4] T. Kotnik, L. Rems, M. Tarek, D. Miklavčič, Membrane Electroporation and Electropermeabilization: Mechanisms and Models, *Annu. Rev. Biophys.* 48 (2019) 63–91. <https://doi.org/10.1146/annurev-biophys-052118-115451>.
- [5] L. Gibot, A. Montigny, H. Baaziz, I. Fourquaux, M. Audebert, M.P. Rols, Calcium delivery by electroporation induces in vitro cell death through mitochondrial dysfunction without DNA damages, *Cancers (Basel)*. 12 (2020). <https://doi.org/10.3390/cancers12020425>.
- [6] L. Pasquet, S. Chabot, E. Bellard, M.P. Rols, J. Teissie, M. Golzio, Noninvasive Gene Electrotransfer in Skin, *Hum. Gene Ther. Methods.* 30 (2019) 17–22. <https://doi.org/10.1089/hgtb.2018.051>.
- [7] M. Casciola, M. Tarek, A molecular insight into the electro-transfer of small molecules through electropores driven by electric fields, *Biochim. Biophys. Acta - Biomembr.* 1858 (2016) 2278–2289. <https://doi.org/10.1016/j.bbamem.2016.03.022>.

- [8] W. Bo, M. Silkunas, U. Mangalanathan, V. Novickij, M. Casciola, I. Semenov, S. Xiao, O.N. Pakhomova, A.G. Pakhomov, Probing Nanoelectroporation and Resealing of the Cell Membrane by the Entry of Ca<sup>2+</sup> and Ba<sup>2+</sup> Ions, *Int. J. Mol. Sci.* 21 (2020) 3386. <https://doi.org/10.3390/ijms21093386>.
- [9] J. TEISSIE, M.-P. ROLS, Manipulation of Cell Cytoskeleton Affects the Lifetime of Cell Membrane Electroporation, *Ann. N. Y. Acad. Sci.* 720 (1994) 98–110. <https://doi.org/10.1111/j.1749-6632.1994.tb30438.x>.
- [10] A.G. Pakhomov, A.M. Bowman, B.L. Ibey, F.M. Andre, O.N. Pakhomova, K.H. Schoenbach, Lipid nanopores can form a stable, ion channel-like conduction pathway in cell membrane, *Biochem. Biophys. Res. Commun.* 385 (2009) 181–186. <https://doi.org/10.1016/j.bbrc.2009.05.035>.
- [11] M.P. Rols, J. Teissie, Electroporation of mammalian cells. Quantitative analysis of the phenomenon, *Biophys. J.* 58 (1990) 1089–1098. [https://doi.org/10.1016/S0006-3495\(90\)82451-6](https://doi.org/10.1016/S0006-3495(90)82451-6).
- [12] H. Hanna, A. Denzi, M. Liberti, F.M. André, L.M. Mir, Electroporation of Inner and Outer Cell Membranes with Microsecond Pulsed Electric Fields: Quantitative Study with Calcium Ions, *Sci. Rep.* 7 (2017) 1–14. <https://doi.org/10.1038/s41598-017-12960-w>.
- [13] Z.A. Levine, P.T. Vernier, Life cycle of an electropore: Field-dependent and field-independent steps in pore creation and annihilation, *J. Membr. Biol.* 236 (2010) 27–36. <https://doi.org/10.1007/s00232-010-9277-y>.
- [14] W.F.D. Bennett, N. Sapay, D.P. Tieleman, Atomistic simulations of pore formation and closure in lipid bilayers, *Biophys. J.* 106 (2014) 210–219. <https://doi.org/10.1016/j.bpj.2013.11.4486>.
- [15] L.C. Benov, P.A. Antonov, S.R. Ribarov, Oxidative damage of the membrane-lipids after electroporation, *Gen. Physiol. Biophys.* 13 (1994) 85–97.
- [16] B. Gabriel, J. Teissie, Generation of reactive-oxygen species induced by electroporation of Chinese hamster ovary cells and their consequence on cell viability, *Eur. J. Biochem.* 223 (1994) 25–33. <https://doi.org/10.1111/j.1432-1033.1994.tb18962.x>.
- [17] M. Maccarrone, M.R. Bladergroen, N. Rosato, A.F. Agro, Role of Lipid Peroxidation in Electroporation-Induced Cell Permeability, *Biochem. Biophys. Res. Commun.* 209 (1995) 417–425. <https://doi.org/10.1006/bbrc.1995.1519>.
- [18] M. Maccarrone, N. Rosato, A.F. Agrò, Electroporation enhances cell membrane peroxidation and luminescence., *Biochem. Biophys. Res. Commun.* 206 (1995) 238–245. <https://doi.org/10.1006/bbrc.1995.1033>.
- [19] Y. Zhou, C.K. Berry, P.A. Storer, R.M. Raphael, Peroxidation of polyunsaturated phosphatidyl-choline lipids during electroformation., *Biomaterials.* 28 (2007) 1298–1306. <https://doi.org/10.1016/j.biomaterials.2006.10.016>.
- [20] O.N. Pakhomova, V.A. Khorokhorina, A.M. Bowman, R. Rodaitė-Riševičienė, G. Saulis, S. Xiao, A.G. Pakhomov, Oxidative effects of nanosecond pulsed electric field exposure in cells and cell-free media., *Arch. Biochem. Biophys.* 527 (2012) 55–64. <https://doi.org/10.1016/j.abb.2012.08.004>.
- [21] M. Breton, M. Amirkavei, L.M. Mir, Optimization of the Electroformation of Giant Unilamellar Vesicles (GUVs) with Unsaturated Phospholipids., *J. Membr. Biol.* 248 (2015) 827–835. <https://doi.org/10.1007/s00232-015-9828-3>.
- [22] P. Jurkiewicz, A. Olżyńska, L. Cwiklik, E. Conte, P. Jungwirth, F.M. Megli, M. Hof, Biophysics of Lipid Bilayers Containing Oxidatively Modified Phospholipids: Insights from Fluorescence and EPR Experiments and from MD Simulations, *Biochim. Biophys. Acta.* 1818 (2012) 2388–2402.
- [23] P.T. Vernier, Z.A. Levine, Y.-H. Wu, V. Joubert, M.J. Ziegler, L.M. Mir, D.P. Tieleman, Electroporation fields target oxidatively damaged areas in the cell membrane., *PLoS One.* 4 (2009) e7966. <https://doi.org/10.1371/journal.pone.0007966>.
- [24] L. Beranova, L. Cwiklik, P. Jurkiewicz, M. Hof, P. Jungwirth, Oxidation changes physical properties of phospholipid bilayers: fluorescence spectroscopy and molecular simulations., *Langmuir.* 26 (2010) 6140–6144. <https://doi.org/10.1021/la100657a>.
- [25] S. Kalghatgi, C.S. Spina, J.C. Costello, M. Liesa, J.R. Morones-Ramirez, S. Slomovic, A.

- Molina, O.S. Shirihai, J.J. Collins, Bactericidal antibiotics induce mitochondrial dysfunction and oxidative damage in Mammalian cells., *Sci. Transl. Med.* 5 (2013) 192ra85. <https://doi.org/10.1126/scitranslmed.3006055>.
- [26] P. Bonnafous, M.C. Vernhes, J. Teissié, B. Gabriel, The generation of reactive-oxygen species associated with long-lasting pulse-induced electroporation of mammalian cells is based on a non-destructive alteration of the plasma membrane, *Biochim. Biophys. Acta - Biomembr.* 1461 (1999) 123–134. [https://doi.org/10.1016/S0005-2736\(99\)00154-6](https://doi.org/10.1016/S0005-2736(99)00154-6).
- [27] M. Breton, L.M. Mir, Investigation of the chemical mechanisms involved in the electroporation of membranes at the molecular level, *Bioelectrochemistry.* 119 (2018) 76–83. <https://doi.org/10.1016/j.bioelechem.2017.09.005>.
- [28] M.M. Gaschler, B.R. Stockwell, Lipid peroxidation in cell death, *Biochem. Biophys. Res. Commun.* 482 (2017) 419–425. <https://doi.org/10.1016/j.bbrc.2016.10.086>.
- [29] R. Nuccitelli, K. Lui, M. Kreis, B. Athos, P. Nuccitelli, Nanosecond pulsed electric field stimulation of reactive oxygen species in human pancreatic cancer cells is Ca<sup>2+</sup>-dependent, *Biochem. Biophys. Res. Commun.* 435 (2013) 580–585. <https://doi.org/10.1016/j.bbrc.2013.05.014>.
- [30] W. Ren, N.M. Sain, S.J. Beebe, Nanosecond pulsed electric fields (nsPEFs) activate intrinsic caspase-dependent and caspase-independent cell death in Jurkat cells, *Biochem. Biophys. Res. Commun.* 421 (2012) 808–812. <https://doi.org/10.1016/j.bbrc.2012.04.094>.
- [31] R.M. Cordeiro, Reactive oxygen species at phospholipid bilayers: Distribution, mobility and permeation, *Biochim. Biophys. Acta - Biomembr.* 1838 (2014) 438–444. <https://doi.org/10.1016/j.bbamem.2013.09.016>.
- [32] G. Weber, T. Charitat, M.S. Baptista, A.F. Uchoa, C. Pavani, H.C. Junqueira, Y. Guo, V.A. Baulin, R. Itri, C.M. Marques, A.P. Schroder, Lipid oxidation induces structural changes in biomimetic membranes, *Soft Matter.* 10 (2014) 4241–4247. <https://doi.org/10.1039/c3sm52740a>.
- [33] K.A. Runas, N. Malmstadt, Low levels of lipid oxidation radically increase the passive permeability of lipid bilayers, *Soft Matter.* 11 (2015) 499–505. <https://doi.org/10.1039/c4sm01478b>.
- [34] K.M. Schaich, J. Xie, B.A. Bogusz, Thinking outside the classical chain reaction box of lipid oxidation: Evidence for alternate pathways and the importance of epoxides, *Lipid Technol.* 29 (2017) 91–96. <https://doi.org/10.1002/lite.201700025>.
- [35] L. Rems, M. Viano, M.A. Kasimova, D. Miklavčič, M. Tarek, The contribution of lipid peroxidation to membrane permeability in electroporation: A molecular dynamics study, *Bioelectrochemistry.* 125 (2019) 46–57. <https://doi.org/10.1016/j.bioelechem.2018.07.018>.
- [36] K.A. Riske, T.P. Sudbrack, N.L. Archilha, A.F. Uchoa, A.P. Schroder, C.M. Marques, M.S. Baptista, R. Itri, Giant vesicles under oxidative stress induced by a membrane-anchored photosensitizer, *Biophys. J.* 97 (2009) 1362–1370. <https://doi.org/10.1016/j.bpj.2009.06.023>.
- [37] V.L. Sukhorukov, W.M. Arnold, U. Zimmermann, Hypotonically induced changes in the plasma membrane of cultured mammalian cells, *J. Membr. Biol.* 132 (1993) 27–40. <https://doi.org/10.1007/BF00233049>.
- [38] A. Reis, C.M. Spickett, Chemistry of phospholipid oxidation, *Biochim. Biophys. Acta - Biomembr.* 1818 (2012) 2374–2387. <https://doi.org/10.1016/j.bbamem.2012.02.002>.
- [39] R. Domínguez, M. Pateiro, M. Gagaoua, F.J. Barba, W. Zhang, J.M. Lorenzo, A Comprehensive Review on Lipid Oxidation in Meat and Meat Products, *Antioxidants.* 8 (2019) 429. <https://doi.org/10.3390/antiox8100429>.
- [40] Z.A.M. Zielinski, D.A. Pratt, Lipid Peroxidation: Kinetics, Mechanisms, and Products, *J. Org. Chem.* 82 (2017) 2817–2825. <https://doi.org/10.1021/acs.joc.7b00152>.
- [41] P. Boonnoy, V. Jarerattanachai, M. Karttunen, J. Wong-ekkabut, Bilayer Deformation, Pores, and Micellation Induced by Oxidized Lipids, *J. Phys. Chem. Lett.* 6 (2015) 4884–4888. <https://doi.org/10.1021/acs.jpcclett.5b02405>.
- [42] A.G. Pakhomov, R. Shevin, J.A. White, J.F. Kolb, O.N. Pakhomova, R.P. Joshi, K.H. Schoenbach, Membrane permeabilization and cell damage by ultrashort electric field shocks, *Arch. Biochem. Biophys.* 465 (2007) 109–118. <https://doi.org/10.1016/j.abb.2007.05.003>.

- [43] S. Sankhagowit, S.H. Wu, R. Biswas, C.T. Riche, M.L. Povinelli, N. Malmstadt, The dynamics of giant unilamellar vesicle oxidation probed by morphological transitions, *Biochim. Biophys. Acta - Biomembr.* 1838 (2014) 2615–2624. <https://doi.org/10.1016/j.bbamem.2014.06.020>.
- [44] D. Casares, P. V. Escribá, C.A. Rosselló, Membrane lipid composition: Effect on membrane and organelle structure, function and compartmentalization and therapeutic avenues, *Int. J. Mol. Sci.* 20 (2019) 2167. <https://doi.org/10.3390/ijms20092167>.
- [45] G.O. Fruhwirth, A. Loidl, A. Hermetter, Oxidized phospholipids: From molecular properties to disease, *Biochim. Biophys. Acta - Mol. Basis Dis.* 1772 (2007) 718–736. <https://doi.org/10.1016/j.bbadis.2007.04.009>.
- [46] C.C. Lai, S.H. Yang, B.J. Finlayson-Pitts, Interactions of monolayers of unsaturated phosphocholines with ozone at the air-water interface, *Langmuir.* 10 (1994) 4637–4644. <https://doi.org/10.1021/la00024a041>.
- [47] M.A. Cuendet, M.E. Tuckerman, Free Energy Reconstruction from Metadynamics or Adiabatic Free Energy Dynamics Simulations, *J. Chem. Theory Comput.* 10 (2014) 2975–2986. <https://doi.org/10.1021/ct500012b>.
- [48] L. Martinez, R. Andrade, E.G. Birgin, J.M. Martínez, PACKMOL: A package for building initial configurations for molecular dynamics simulations, *J. Comput. Chem.* 30 (2009) 2157–2164. <https://doi.org/10.1002/jcc.21224>.
- [49] J.B. Klauda, R.M. Venable, J.A. Freites, J.W. O'Connor, D.J. Tobias, C. Mondragon-Ramirez, I. Vorobyov, A.D. MacKerell, R.W. Pastor, Update of the CHARMM All-Atom Additive Force Field for Lipids: Validation on Six Lipid Types, *J. Phys. Chem. B.* 114 (2010) 7830–7843. <https://doi.org/10.1021/jp101759q>.
- [50] W.L. Jorgensen, J. Chandrasekhar, J.D. Madura, R.W. Impey, M.L. Klein, Comparison of simple potential functions for simulating liquid water, *J. Chem. Phys.* 79 (1983) 926–935. <https://doi.org/10.1063/1.445869>.
- [51] J. Melcr, H. Martinez-Seara, R. Nencini, J. Kolafa, P. Jungwirth, O.H.S. Ollila, Accurate Binding of Sodium and Calcium to a POPC Bilayer by Effective Inclusion of Electronic Polarization, *J. Phys. Chem. B.* 122 (2018) 4546–4557. <https://doi.org/10.1021/acs.jpcc.7b12510>.
- [52] B. Hess, H. Bekker, H.J.C. Berendsen, J.G.E.M. Fraaije, LINCS: A linear constraint solver for molecular simulations, *J. Comput. Chem.* 18 (1997) 1463–1472. [https://doi.org/10.1002/\(SICI\)1096-987X\(199709\)18:12<1463::AID-JCC4>3.0.CO;2-H](https://doi.org/10.1002/(SICI)1096-987X(199709)18:12<1463::AID-JCC4>3.0.CO;2-H).
- [53] T. Darden, D. York, L. Pedersen, Particle mesh Ewald: An  $N \cdot \log(N)$  method for Ewald sums in large systems, *J. Chem. Phys.* 98 (1993) 10089–10092. <https://doi.org/10.1063/1.464397>.
- [54] B.A. Wilson, A. Ramanathan, C.F. Lopez, LoLab-VU/PyBILT: A Python toolkit to analyze molecular simulation trajectories of lipid bilayer systems., (2019). <https://doi.org/10.5281/ZENODO.3426128>.
- [55] V. Gapsys, B.L. De Groot, R. Briones, Computational analysis of local membrane properties, *J. Comput. Aided. Mol. Des.* 27 (2013) 845–858. <https://doi.org/10.1007/s10822-013-9684-0>.
- [56] W. Humphrey, A. Dalke, K. Schulten, VMD: Visual molecular dynamics, *J. Mol. Graph.* 14 (1996) 33–38. [https://doi.org/10.1016/0263-7855\(96\)00018-5](https://doi.org/10.1016/0263-7855(96)00018-5).
- [57] M. Chen, M.A. Cuendet, M.E. Tuckerman, Heating and flooding: A unified approach for rapid generation of free energy surfaces, *J. Chem. Phys.* 137 (2012) 024102. <https://doi.org/10.1063/1.4733389>.
- [58] J.M. Escoffre, P. Campomanes, M. Tarek, A. Bouakaz, New insights on the role of ROS in the mechanisms of sonoporation-mediated gene delivery, *Ultrason. Sonochem.* 64 (2020). <https://doi.org/10.1016/j.ultsonch.2020.104998>.
- [59] D. Bonhenry, F. Dehez, M. Tarek, Effects of hydration on the protonation state of a lysine analog crossing a phospholipid bilayer-insights from molecular dynamics and free-energy calculations, *Phys. Chem. Chem. Phys.* 20 (2018) 9101–9107. <https://doi.org/10.1039/c8cp00312b>.
- [60] A. Stachowicz-Kuśnierz, L. Cwiklik, J. Korchowicz, E. Rogalska, B. Korchowicz, The impact of lipid oxidation on the functioning of a lung surfactant model, *Phys. Chem. Chem. Phys.* 20 (2018) 24968–24978. <https://doi.org/10.1039/c8cp04496a>.

- [61] B. Hess, C. Kutzner, D. Van Der Spoel, E. Lindahl, GRGMACS 4: Algorithms for highly efficient, load-balanced, and scalable molecular simulation, *J. Chem. Theory Comput.* 4 (2008) 435–447. <https://doi.org/10.1021/ct700301q>.
- [62] M. Bonomi, D. Branduardi, G. Bussi, C. Camilloni, D. Provasi, P. Raiteri, D. Donadio, F. Marinelli, F. Pietrucci, R.A. Broglia, M. Parrinello, PLUMED: A portable plugin for free-energy calculations with molecular dynamics, *Comput. Phys. Commun.* 180 (2009) 1961–1972. <https://doi.org/10.1016/j.cpc.2009.05.011>.
- [63] I. Vorobyov, T.E. Olson, J.H. Kim, R.E. Koeppe, O.S. Andersen, T.W. Allen, Ion-induced defect permeation of lipid membranes, *Biophys. J.* 106 (2014) 586–597. <https://doi.org/10.1016/j.bpj.2013.12.027>.
- [64] S.-J. Marrink, H.J.C. Berendsen, Simulation of water transport through a lipid membrane, *J. Phys. Chem.* 98 (1994) 4155–4168. <https://doi.org/10.1021/j100066a040>.
- [65] D. Bonhenry, M. Tarek, F. Dehez, Effects of phospholipid composition on the transfer of a small cationic peptide across a model biological membrane, *J. Chem. Theory Comput.* 9 (2013) 5675–5684. <https://doi.org/10.1021/ct400576e>.
- [66] P.S. Andersen, M. Fuchs, Potential energy barriers to ion transport within lipid bilayers. Studies with tetraphenylborate, *Biophys. J.* 15 (1975) 795–830. [https://doi.org/10.1016/S0006-3495\(75\)85856-5](https://doi.org/10.1016/S0006-3495(75)85856-5).
- [67] G. Hummer, Position-dependent diffusion coefficients and free energies from Bayesian analysis of equilibrium and replica molecular dynamics simulations, *New J. Phys.* 7 (2005) 34. <https://doi.org/10.1088/1367-2630/7/1/034>.
- [68] J.D. Watson, F.H.C. Crick, Molecular structure of nucleic acids: A structure for deoxyribose nucleic acid, *Nature.* 171 (1953) 737–738. <https://doi.org/10.1038/171737a0>.
- [69] J.L. Young, D.A. Dean, Electroporation-Mediated Gene Delivery, *Adv. Genet.* 89 (2015) 49–88. <https://doi.org/10.1016/bs.adgen.2014.10.003>.
- [70] N. Kučerka, M.P. Nieh, J. Katsaras, Fluid phase lipid areas and bilayer thicknesses of commonly used phosphatidylcholines as a function of temperature, *Biochim. Biophys. Acta - Biomembr.* 1808 (2011) 2761–2771. <https://doi.org/10.1016/j.bbamem.2011.07.022>.
- [71] Y. Miyazaki, S. Okazaki, W. Shinoda, Free energy analysis of membrane pore formation process in the presence of multiple melittin peptides, *Biochim. Biophys. Acta - Biomembr.* 1861 (2019) 1409–1419. <https://doi.org/10.1016/j.bbamem.2019.03.002>.
- [72] T.-Y. Wang, M.D.J. Libardo, A.M. Angeles-Boza, J.-P. Pellois, Membrane Oxidation in Cell Delivery and Cell Killing Applications., *ACS Chem. Biol.* 12 (2017) 1170–1182. <https://doi.org/10.1021/acscchembio.7b00237>.
- [73] J.M. Escoffre, P. Campomanes, M. Tarek, A. Bouakaz, New insights on the role of ROS in the mechanisms of sonoporation-mediated gene delivery, *Ultrason. Sonochem.* 64 (2020). <https://doi.org/10.1016/j.ultsonch.2020.104998>.
- [74] C. Mu, J. Wang, K.M. Barraza, X. Zhang, J.L. Beauchamp, Mass Spectrometric Study of Acoustically Levitated Droplets Illuminates Molecular-Level Mechanism of Photodynamic Therapy for Cancer involving Lipid Oxidation, *Angew. Chemie - Int. Ed.* 58 (2019) 8082–8086. <https://doi.org/10.1002/anie.201902815>.
- [75] P. Boonnoy, V. Jarerattanachai, M. Karttunen, J. Wong-Ekkabut, Bilayer Deformation, Pores, and Micellation Induced by Oxidized Lipids, *J. Phys. Chem. Lett.* 6 (2015) 4884–4888. <https://doi.org/10.1021/acs.jpcllett.5b02405>.
- [76] J. Van Der Paal, E.C. Neyts, C.C.W. Verlaack, A. Bogaerts, Effect of lipid peroxidation on membrane permeability of cancer and normal cells subjected to oxidative stress, *Chem. Sci.* 7 (2016) 489–498. <https://doi.org/10.1039/c5sc02311d>.
- [77] K.A. Runas, N. Malmstadt, Low levels of lipid oxidation radically increase the passive permeability of lipid bilayers, *Soft Matter.* 11 (2015) 499–505. <https://doi.org/10.1039/c4sm01478b>.
- [78] M. Pavlin, V. Leben, D. Miklavčič, Electroporation in dense cell suspension-Theoretical and experimental analysis of ion diffusion and cell permeabilization, *Biochim. Biophys. Acta - Gen. Subj.* 1770 (2007) 12–23. <https://doi.org/10.1016/j.bbagen.2006.06.014>.
- [79] J. Nourooz-Zadeh, Ferrous ion oxidation in presence of xylenol orange for detection of lipid hydroperoxides in plasma, *Methods Enzymol.* 300 (1999) 58–62.

- [https://doi.org/10.1016/S0076-6879\(99\)00113-5](https://doi.org/10.1016/S0076-6879(99)00113-5).
- [80] C.W. Kwon, K.-M. Park, J.W. Park, J. Lee, S.J. Choi, P.-S. Chang, Rapid and Sensitive Determination of Lipid Oxidation Using the Reagent Kit Based on Spectrophotometry (FOODLABfat System), *J. Chem.* 2016 (2016) 1468743. <https://doi.org/10.1155/2016/1468743>.
- [81] J. Nourooz-Zadeh, N.K. Gopaul, S. Barrow, A.I. Mallet, E.E. Änggård, Analysis of F2-isoprostanes as indicators of non-enzymatic lipid peroxidation in vivo by gas chromatography-mass spectrometry: development of a solid-phase extraction procedure, *J. Chromatogr. B Biomed. Sci. Appl.* 667 (1995) 199–208. [https://doi.org/10.1016/0378-4347\(95\)00035-H](https://doi.org/10.1016/0378-4347(95)00035-H).
- [82] A. Bachi, E. Zuccato, M. Baraldi, R. Fanelli, C. Chiabrando, Measurement of urinary 8-epi-prostaglandin F2 $\alpha$ , a novel index of lipid peroxidation in vivo, by immunoaffinity extraction/gas chromatography-mass spectrometry. Basal levels in smokers and nonsmokers, *Free Radic. Biol. Med.* 20 (1996) 619–624. [https://doi.org/10.1016/0891-5849\(95\)02087-X](https://doi.org/10.1016/0891-5849(95)02087-X).
- [83] A. Kaur, J.L. Kolanowski, E.J. New, Reversible Fluorescent Probes for Biological Redox States, *Angew. Chemie Int. Ed.* 55 (2016) 1602–1613. <https://doi.org/10.1002/anie.201506353>.
- [84] O. Michel, A.G. Pakhomov, M. Casciola, J. Saczko, J. Kulbacka, O.N. Pakhomova, Electroporation does not correlate with plasma membrane lipid oxidation, *Bioelectrochemistry.* 132 (2020) 107433. <https://doi.org/10.1016/j.bioelechem.2019.107433>.
- [85] G.P.C. Drummen, B.M. Gadella, J.A. Post, J.F. Brouwers, Mass spectrometric characterization of the oxidation of the fluorescent lipid peroxidation reporter molecule C11-BODIPY581/591, *Free Radic. Biol. Med.* 36 (2004) 1635–1644. <https://doi.org/10.1016/j.freeradbiomed.2004.03.014>.
- [86] L.C. Benov, P.A. Antonov, S.R. Ribarov, Oxidative damage of the membrane lipids after electroporation., *Gen. Physiol. Biophys.* 13 (1994) 85–97. <https://europepmc.org/article/med/7806071> (accessed July 21, 2020).
- [87] O. Yun, X.A. Zeng, C.S. Brennan, Z. Han, Effect of Pulsed electric field on membrane Lipids and Oxidative injury of Salmonella typhimurium, *Int. J. Mol. Sci.* 17 (2016). <https://doi.org/10.3390/ijms17081374>.
- [88] S.K. Yeo, M.T. Liong, Effect of electroporation on viability and bioconversion of isoflavones in mannitol-soymilk fermented by lactobacilli and bifidobacteria, *J. Sci. Food Agric.* 93 (2013) 396–409. <https://doi.org/10.1002/jsfa.5775>.
- [89] J. Li, H. Lin, The current-voltage relation for electropores with conductivity gradients, *Biomicrofluidics.* 4 (2010). <https://doi.org/10.1063/1.3324847>.
- [90] A.G. Pakhomov, R. Shevin, J.A. White, J.F. Kolb, O.N. Pakhomova, R.P. Joshi, K.H. Schoenbach, Membrane permeabilization and cell damage by ultrashort electric field shocks, *Arch. Biochem. Biophys.* 465 (2007) 109–118. <https://doi.org/10.1016/j.abb.2007.05.003>.
- [91] B.L. Ibey, S. Xiao, K.H. Schoenbach, M.R. Murphy, A.G. Pakhomov, Plasma membrane permeabilization by 60- and 600-ns electric pulses is determined by the absorbed dose, *Bioelectromagnetics.* 30 (2009) 92–99. <https://doi.org/10.1002/bem.20451>.
- [92] B.L. Ibey, D.G. Mixon, J.A. Payne, A. Bowman, K. Sickendick, G.J. Wilmlink, W.P. Roach, A.G. Pakhomov, Plasma membrane permeabilization by trains of ultrashort electric pulses, *Bioelectrochemistry.* 79 (2010) 114–121. <https://doi.org/10.1016/j.bioelechem.2010.01.001>.
- [93] O.G. Mouritsen, M.J. Zuckermann, What’s so special about cholesterol?, in: *Lipids*, John Wiley & Sons, Ltd, 2004: pp. 1101–1113. <https://doi.org/10.1007/s11745-004-1336-x>.
- [94] A.G. Pakhomov, R. Shevin, J.A. White, J.F. Kolb, O.N. Pakhomova, R.P. Joshi, K.H. Schoenbach, Membrane permeabilization and cell damage by ultrashort electric field shocks, *Arch. Biochem. Biophys.* 465 (2007) 109–118. <https://doi.org/10.1016/j.abb.2007.05.003>.
- [95] P. Kramar, L. Delemotte, A.M. Lebar, M. Kotulska, M. Tarek, D. Miklavčič, Molecular-level characterization of lipid membrane electroporation using linearly rising current, *J. Membr. Biol.* 245 (2012) 651–659. <https://doi.org/10.1007/s00232-012-9487-6>.
- [96] B.L. Heckmann, B. Tummers, D.R. Green, Crashing the computer: apoptosis vs. necroptosis in neuroinflammation, *Cell Death Differ.* 26 (2019) 41–52. <https://doi.org/10.1038/s41418-018-0195-3>.
- [97] W.S. Yang, K.J. Kim, M.M. Gaschler, M. Patel, M.S. Shchepinov, B.R. Stockwell,



- Peroxidation of polyunsaturated fatty acids by lipoxygenases drives ferroptosis, *Proc. Natl. Acad. Sci. U. S. A.* 113 (2016) E4966–E4975. <https://doi.org/10.1073/pnas.1603244113>.
- [98] Y. Xie, W. Hou, X. Song, Y. Yu, J. Huang, X. Sun, R. Kang, D. Tang, Ferroptosis: Process and function, *Cell Death Differ.* 23 (2016) 369–379. <https://doi.org/10.1038/cdd.2015.158>.
- [99] M. Riegman, L. Sagie, C. Galed, T. Levin, N. Steinberg, S.J. Dixon, U. Wiesner, M.S. Bradbury, P. Niethammer, A. Zaritsky, M. Overholtzer, Ferroptosis occurs through an osmotic mechanism and propagates independently of cell rupture, *Nat. Cell Biol.* 22 (2020) 1042–1048. <https://doi.org/10.1038/s41556-020-0565-1>.
- [100] A.J. Davidson, W. Wood, Igniting the spread of ferroptotic cell death, *Nat. Cell Biol.* 22 (2020) 1027–1029. <https://doi.org/10.1038/s41556-020-0570-4>.
- [101] J.M. Weinberg, A. Bienholz, M.A. Venkatachalam, The role of glycine in regulated cell death, *Cell. Mol. Life Sci.* 73 (2016) 2285–2308. <https://doi.org/10.1007/s00018-016-2201-6>.
- [102] L. Pedrera, R.A. Espiritu, U. Ros, A. Schmitt, S. Hailfinger, A.J. García-Sáez, Ferroptotic pores induce Ca<sup>2+</sup> fluxes and ESCRT-III activation to modulate cell death kinetics, *BioRxiv.* (2019) 1–34. <https://doi.org/10.1101/867564>.
- [103] J.X. Ren, X. Sun, X.L. Yan, Z.N. Guo, Y. Yang, Ferroptosis in Neurological Diseases, *Front. Cell. Neurosci.* 14 (2020). <https://doi.org/10.3389/fncel.2020.00218>.
- [104] S. Masaldan, A.I. Bush, D. Devos, A.S. Rolland, C. Moreau, Striking while the iron is hot: Iron metabolism and ferroptosis in neurodegeneration, *Free Radic. Biol. Med.* 133 (2019) 221–233. <https://doi.org/10.1016/j.freeradbiomed.2018.09.033>.
- [105] X. She, B. Lan, H. Tian, B. Tang, Cross Talk Between Ferroptosis and Cerebral Ischemia, *Front. Neurosci.* 14 (2020) 1–9. <https://doi.org/10.3389/fnins.2020.00776>.
- [106] U. Zeilhofer, Voltage-gated calcium channels, *XPharm Compr. Pharmacol. Ref.* (2007) 1–4. <https://doi.org/10.1016/B978-008055232-3.60392-7>.
- [107] M.Ö. Bostanci, F. Bagirici, Blocking of L-type calcium channels protects hippocampal and nigral neurons against iron neurotoxicity: The role of L-type calcium channels in iron-induced neurotoxicity, *Int. J. Neurosci.* 123 (2013) 876–882. <https://doi.org/10.3109/00207454.2013.813510>.
- [108] N.M. Ismail, K. Jaarin, S.K. Vasudevan, S. Hashim, Effects of Nicardipine on Lipid Peroxidation in Rabbits Given 2% Cholesterol Diet, *Pharmacol. Toxicol.* 77 (1995) 10–15. <https://doi.org/10.1111/j.1600-0773.1995.tb01907.x>.
- [109] I. Tong Mak, P. Boehme, W.B. Weglicki, Antioxidant effects of calcium channel blockers against free radical injury in endothelial cells: Correlation of protection with preservation of glutathione levels, *Circ. Res.* 70 (1992) 1099–1103. <https://doi.org/10.1161/01.res.70.6.1099>.
- [110] P. Maher, K. van Leyen, P.N. Dey, B. Honrath, A. Dolga, A. Methner, The role of Ca<sup>2+</sup> in cell death caused by oxidative glutamate toxicity and ferroptosis, *Cell Calcium.* 70 (2018) 47–55. <https://doi.org/10.1016/j.ceca.2017.05.007>.
- [111] M.T. Núñez, C. Hidalgo, Noxious iron–calcium connections in neurodegeneration, *Front. Neurosci.* 13 (2019) 1–18. <https://doi.org/10.3389/fnins.2019.00048>.
- [112] N. DeGregorio-Rocasolano, O. Martí-Sistac, T. Gasull, Deciphering the iron side of stroke: Neurodegeneration at the crossroads between iron dyshomeostasis, excitotoxicity, and ferroptosis, *Front. Neurosci.* 13 (2019) 1–17. <https://doi.org/10.3389/fnins.2019.00085>.
- [113] A.D. Dupuy, D.M. Engelman, Protein area occupancy at the center of the red blood cell membrane, *Proc. Natl. Acad. Sci. U. S. A.* 105 (2008) 2848–2852. <https://doi.org/10.1073/pnas.0712379105>.
- [114] M.R. Krause, S.L. Regen, The structural role of cholesterol in cell membranes: From condensed bilayers to lipid rafts, *Acc. Chem. Res.* 47 (2014) 3512–3521. <https://doi.org/10.1021/ar500260t>.
- [115] S. Ramadurai, A. Holt, V. Krasnikov, G. Van Den Bogaart, J.A. Killian, B. Poolman, Lateral diffusion of membrane proteins, *J. Am. Chem. Soc.* 131 (2009) 12650–12656. <https://doi.org/10.1021/ja902853g>.
- [116] M. Olšinová, P. Jurkiewicz, I. Kishko, J. Sýkora, J. Sabó, M. Hof, L. Cwiklik, M. Cebecauer, Roughness of Transmembrane Helices Reduces Lipid Membrane Dynamics, *IScience.* 10 (2018) 87–97. <https://doi.org/10.1016/j.isci.2018.11.026>.
- [117] M.P. Rols, J. Teissié, Experimental evidence for the involvement of the cytoskeleton in

mammalian cell electropermeabilization, BBA - Biomembr. 1111 (1992) 45–50.  
[https://doi.org/10.1016/0005-2736\(92\)90272-N](https://doi.org/10.1016/0005-2736(92)90272-N).

## **Appendices:**

Supporting Information

## Figures:

Fig. 1. Schematic pathway of process formation primary and secondary oxidation products.

Fig. 2 Schematic representation of oxidized membrane lesions (secondary oxidized lipids), which are expected to be formed in the cell membrane after exposure to electric pulses. The schematic is hypothetical and the lesions are not drawn to scale. The image in the center schematically depicts the molecular organization in one of the lesions. The one on the right represents the state after a certain time, where the secondary oxidized lipids diffused out.

Fig. 3. Time evolution of pore formation in the systems without cholesterol (blue panels) and with cholesterol (orange panels). top view. Blue and white spheres represent the choline and Phosphate groups of the POPC molecules. The magenta sphere the Phosphates of the PoxnoPCs molecules.

Fig. 4 Thickness (A) and area per lipid (B) for lipid membranes with 0%, 10%, 20% and 50% percent of secondary oxidation lipids (PoxnoPC) in the POPC lipid bilayer. The bars indicate standard deviation based on the last 100 ns of the MD trajectories.

Fig. 5. The PMF profiles of Na ion (A) and Cl ion (B) in the investigated bilayer systems. The center of the bilayer is at  $z = 0$  nm. The ion penetration barrier is the difference between the lowest PMF on the plot and the highest one for a given PoxnoPC concentration.

Fig. 6. Permeability to  $\text{Na}^+$  (A) and  $\text{Cl}^-$  (B) ions and overall conductance (C) of the studied systems.
